# Supplementary material
Source: HighWire-hosted journal article supplement (http://asnr-client.stage.highwire.org/highwire/filestream/182013/field_highwire_adjunct_files/0/4142_table.pdf)
Supplement: 4142_table.pdf [file 4142_table.pdf]

**On-line Table: Analysis of MR imaging of suprasellar papillary craniopharyngioma and suprasellar germ cell tumors**

| Variables                                                       | PCP (n = 18) | GCT (n = 17) | OR   | 95% CI   | P Value <sup>a</sup> |
|-----------------------------------------------------------------|--------------|--------------|------|----------|----------------------|
| Location of lesion                                              |              |              |      |          | .1187                |
| Suprasella and 3rd ventricle                                    | 9 (50%)      | 4 (24%)      | 1.0  | Ref      |                      |
| Suprasella and sella                                            | 3 (17%)      | 8 (47%)      | 6.0  | 1.02–35  |                      |
| Suprasella, sella, and 3rd ventricle                            | 6 (33%)      | 5 (29%)      | 1.9  | .35–10   |                      |
| Size (cm) (mean)                                                | 3.18 ± 1.05  | 2.14 ± 1.46  |      |          | .0064                |
| Component                                                       |              |              |      |          | .0002                |
| Cystic predominance                                             | 12 (67%)     | 1 (6%)       | .03  | .003–.30 |                      |
| Solid predominance                                              | 6 (33%)      | 16 (94%)     | 32   | 3.4–302  |                      |
| MRI signal intensity                                            |              |              |      |          |                      |
| TIWI                                                            |              |              |      |          | .2962                |
| Hypo                                                            | 2 (11%)      | 1 (6%)       | 1.0  | Ref      |                      |
| Iso                                                             | 14 (78%)     | 16 (94%)     | 2.3  | .19–28   |                      |
| Hyper                                                           | 2 (11%)      | 0 (0%)       | ∞    | NA       |                      |
| T2WI                                                            |              |              |      |          | .9616                |
| Hypo                                                            | 2 (11%)      | 2 (12%)      | 1.0  | Ref      |                      |
| Iso                                                             | 16 (89%)     | 15 (88%)     | .94  | .12–7.5  |                      |
| Hyper                                                           | 0 (0%)       | 0 (0%)       | NA   | NA       |                      |
| DWI <sup>b</sup>                                                |              |              |      |          | .0009                |
| Hypo                                                            | 14 (82%)     | 2 (17%)      | 1.0  | Ref      |                      |
| Iso                                                             | 2 (12%)      | 2 (17%)      | 14   | .83–238  |                      |
| Hyper                                                           | 1 (6%)       | 8 (67%)      | 28   | 3.2–239  |                      |
| Enhancement                                                     | 18 (100%)    | 17 (100%)    | NA   | NA       | 1                    |
| Marginal enhancement                                            | 18 (100%)    | 2 (12%)      | .00  | NA       | <.0001               |
| Shape                                                           |              |              |      |          | <.0001               |
| Spheric                                                         | 17 (94%)     | 1 (6%)       | .004 | .00–.06  |                      |
| Transinfundibular                                               | 1 (6%)       | 16 (94%)     | 272  | 16–4724  |                      |
| Pituitary stalk (mm) (mean)                                     | 1.6 ± 0.4    | 5.4 ± 4.2    |      |          | <.0001               |
| Pituitary gland                                                 |              |              |      |          | .1896                |
| No involvement                                                  | 9 (50%)      | 4 (24%)      | 1.0  | Ref      |                      |
| Infiltrative                                                    | 9 (50%)      | 12 (71%)     | 3.0  | .70–13   |                      |
| Compressed                                                      | 0 (0%)       | 1 (6%)       | ∞    | NA       |                      |
| Associated findings                                             |              |              |      |          |                      |
| Hydrocephalus                                                   | 8 (44%)      | 6 (35%)      | .68  | .18–2.7  | .5808                |
| Tumor intraventricular seedings                                 | 0 (0%)       | 8 (47%)      | ∞    | NA       | .0009                |
| Size change of the pineal gland after radiotherapy <sup>c</sup> | 0 (0%)       | 8 (50%)      | ∞    | NA       | .0014                |
| Compression and/or displacement of the optic chiasm             | 17 (94%)     | 8 (47%)      | .05  | .01–.49  | .0019                |
| Edema of the optic chiasm/tract                                 | 9 (50%)      | 8 (47%)      | 1.1  | .30–4.2  | .8619                |
| Edema of the hypothalamus                                       | 8 (44%)      | 9 (52%)      | 1.4  | .37–5.3  | .6152                |

**Note:**—Hypo indicates hypointensity; Iso, isointensity; Hyper, hyperintensity; Ref, reference; ∞, infinity; NA, the value was not available for calculation in logistic regression.

<sup>a</sup> P = statistical significance as calculated by the log-rank test.

<sup>b</sup> In the PCP group, n = 17; in the GCT group, n = 12.

<sup>c</sup> In the PCP group, n = 17; in the GCT group, n = 16.
